# Supplementary material for: Thermal properties of lauric acid filled in carbon nanotubes as shape-stabilized phase change materials
Source: Royal Society of Chemistry journal article supplement (doi:10.1039/c7cp08557e), 2018-01-01
Supplement: c7cp08557e1.pdf [file c7cp08557e1.pdf]

## Supporting Information

### Thermal Properties of Lauric Acid Confined in Carbon Nanotubes as Shape-stabilized Phase Change Materials

By Yanhui Feng <sup>a, b, \*</sup>, Runzhi Wei <sup>a, d</sup>, Zhi Huang <sup>a, b, \*</sup>, Xinxin Zhang <sup>a, b</sup>, and Ge Wang <sup>c</sup>

<sup>a</sup> School of Energy and Environmental Engineering, University of Science and Technology Beijing, Beijing 100083, China

<sup>b</sup> Beijing Key Laboratory of Energy Saving and Emission Reduction for Metallurgical Industry, University of Science and Technology Beijing, Beijing 100083, China

<sup>c</sup> School of Materials Science and Engineering, University of Science and Technology Beijing, Beijing 100083, China

<sup>d</sup> Metallurgical and Chemical Industry Department, China ENFI Engineering Corporation, Beijing 100038, China

\*Corresponding author.

E-mail address: [yhfeng@me.ustb.edu.cn](mailto:yhfeng@me.ustb.edu.cn) (Yanhui Feng), and [zhihuang@ustb.edu.cn](mailto:zhihuang@ustb.edu.cn) (Zhi Huang)

**MD of phase change temperatures:** The C-form crystal structure [1] of LA was used in the simulation (Fig. S1(a)), with lattice parameters of  $a = 9.524 \pm 0.02 \text{ \AA}$ ,  $b = 4.965 \pm 0.01 \text{ \AA}$ ,  $c = 35.39 \pm 0.07 \text{ \AA}$ , and  $\beta = 129^{\circ}13' \pm 1'$ .

The melting process was from 295K to 355K with a temperature increment of 10K under NPT ensemble. At each temperature, the system was pre-equilibrated with a 200ps run before the data collection in the next 200 ps. The phase change temperatures were obtained based on the change of self-diffusion coefficients at different temperatures. As Fig. S1(b) shows, there are turning points in the curve of self-diffusion coefficients as a function of temperature, regarded as the phase change temperatures. The three turning point of  $53.5^{\circ}\text{C}$ ,  $52.0^{\circ}\text{C}$ , and  $41.9^{\circ}\text{C}$  of LA, 5-10nmCNTs/LA1, and 2-5nmCNTs/LA1, respectively, qualitatively agree with the DSC results.

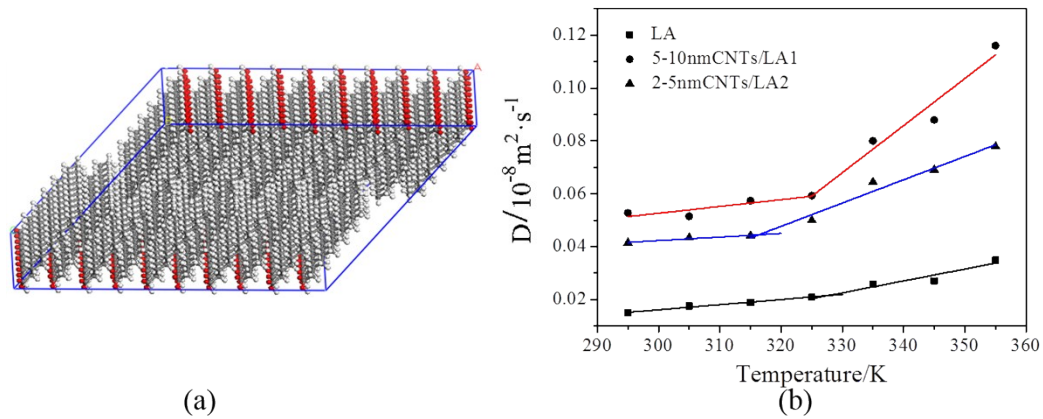

Fig. S1 (a) C-form crystal structure of LA. (b) The self-diffusion coefficients as a function of temperature.

**MD of structure of LA molecules confined in CNTs:** The order parameter was used to characterize the orientation relative to the axis of CNTs, which is defined as follows [2]:

$$S = \frac{3}{2} \langle \cos^2(\theta) \rangle - \frac{1}{2} \quad (\text{S1})$$

where  $\theta$  is the angle between the vector of the end-to-end C atoms and the axis of CNT.

For the molecules on the wall, most values of  $S$  are close to 1, which means that the LA molecules distribute along the axis, and those of the inner molecules are closer to -0.5, which indicate that LA molecules spread on the radial plane and can easily undergo crystallization (Fig. S2).

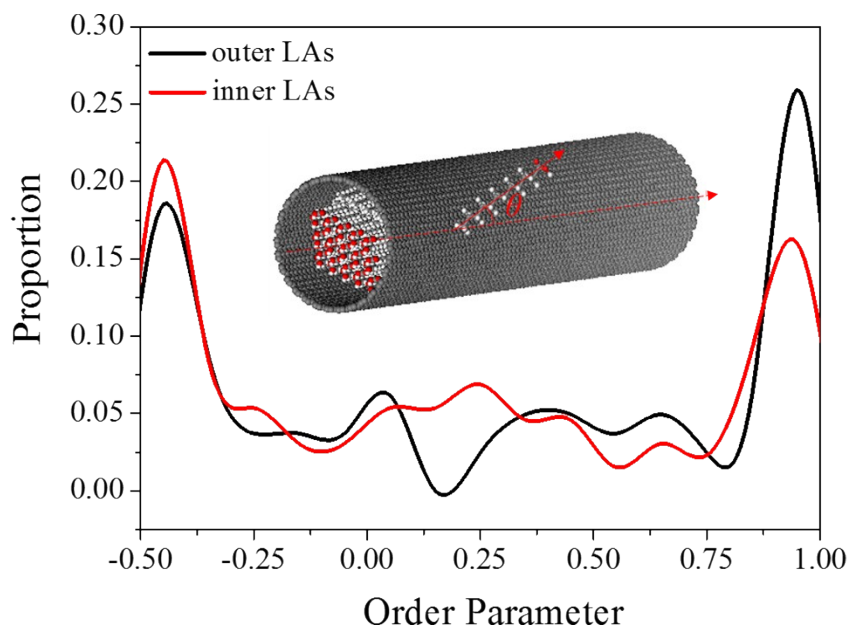

Fig. S2 Order parameter of LA molecules confined in CNTs.
